# Supplementary material for: Diverging fire trends in Northern Ghana’s savanna landscape: Insights from remote sensing and institutional perspectives
Source: Research Square preprint supplement (doi:10.21203/rs.3.rs-6441082/v1), 2025-07-22
Supplement: Supplementary file 1 [file 72861873e16b2c810bdab693.docx]

**Supplementary information**


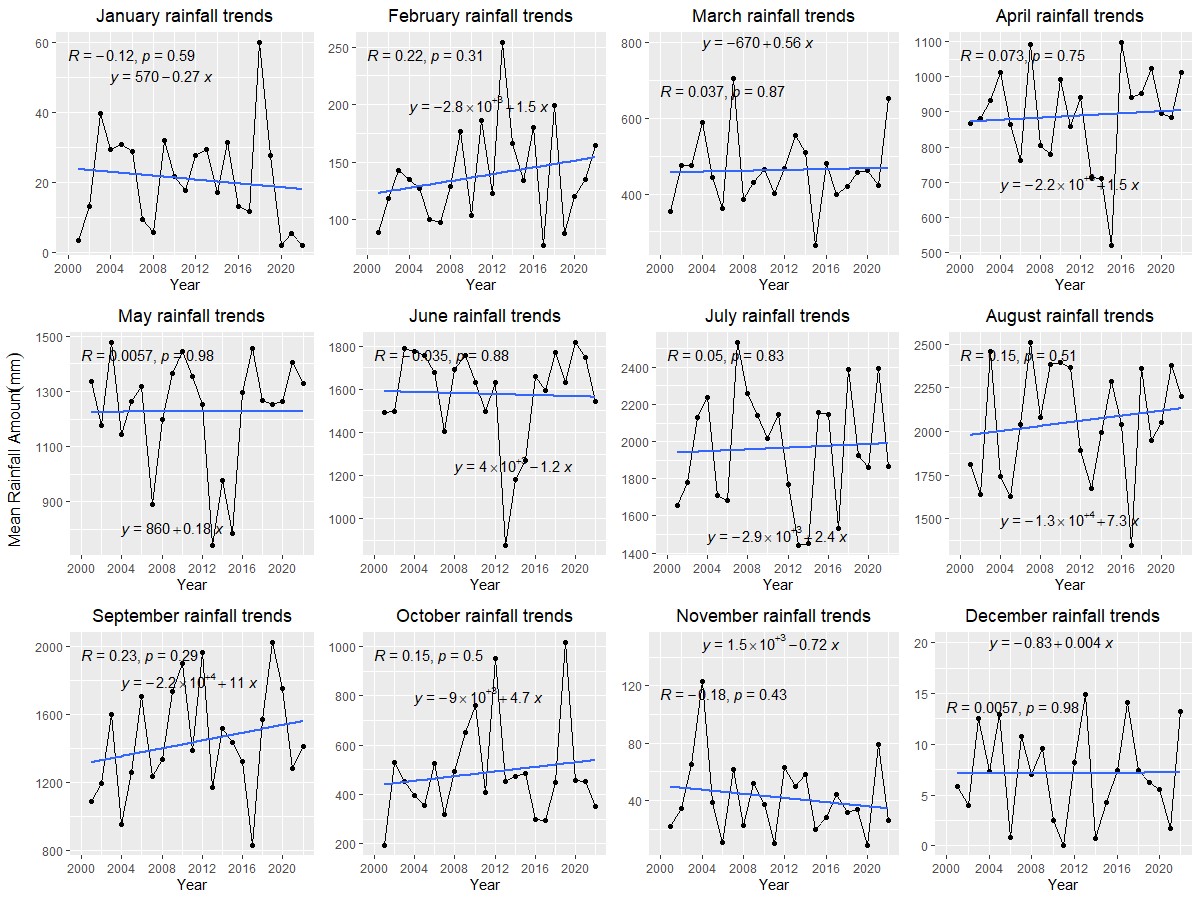


**Fig. 1** Monthly trends of mean rainfall patterns in Northern Ghana between 2001 and 2022


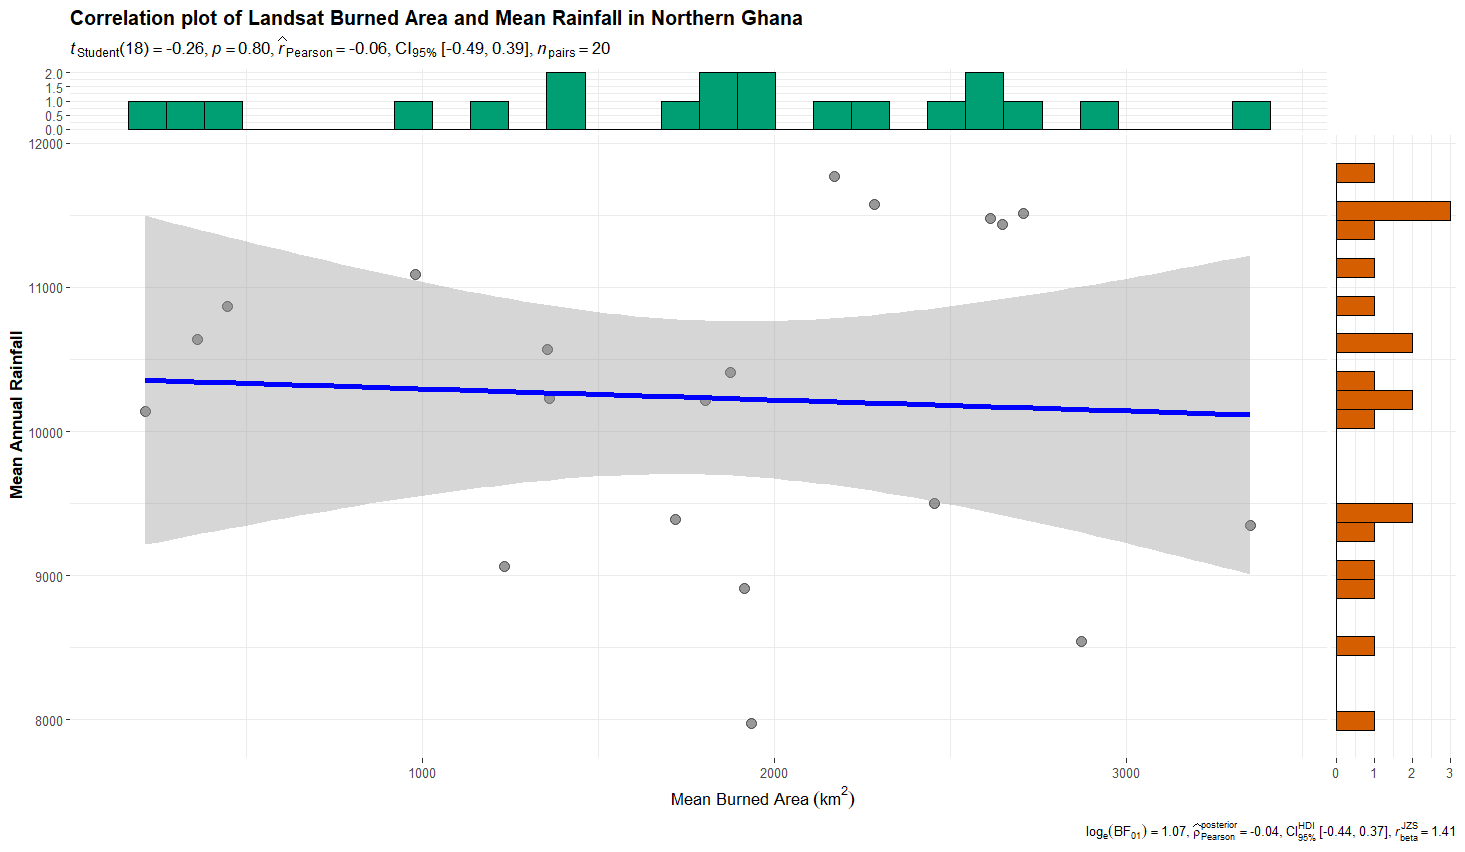


**Fig 2**: Correlation plot of Rainfall and Landsat burned area for Northern Ghana. A weak negative, but not statistically significant correlation was observed between rainfall and Landsat burned area (r = -0.06, p = 0.80)


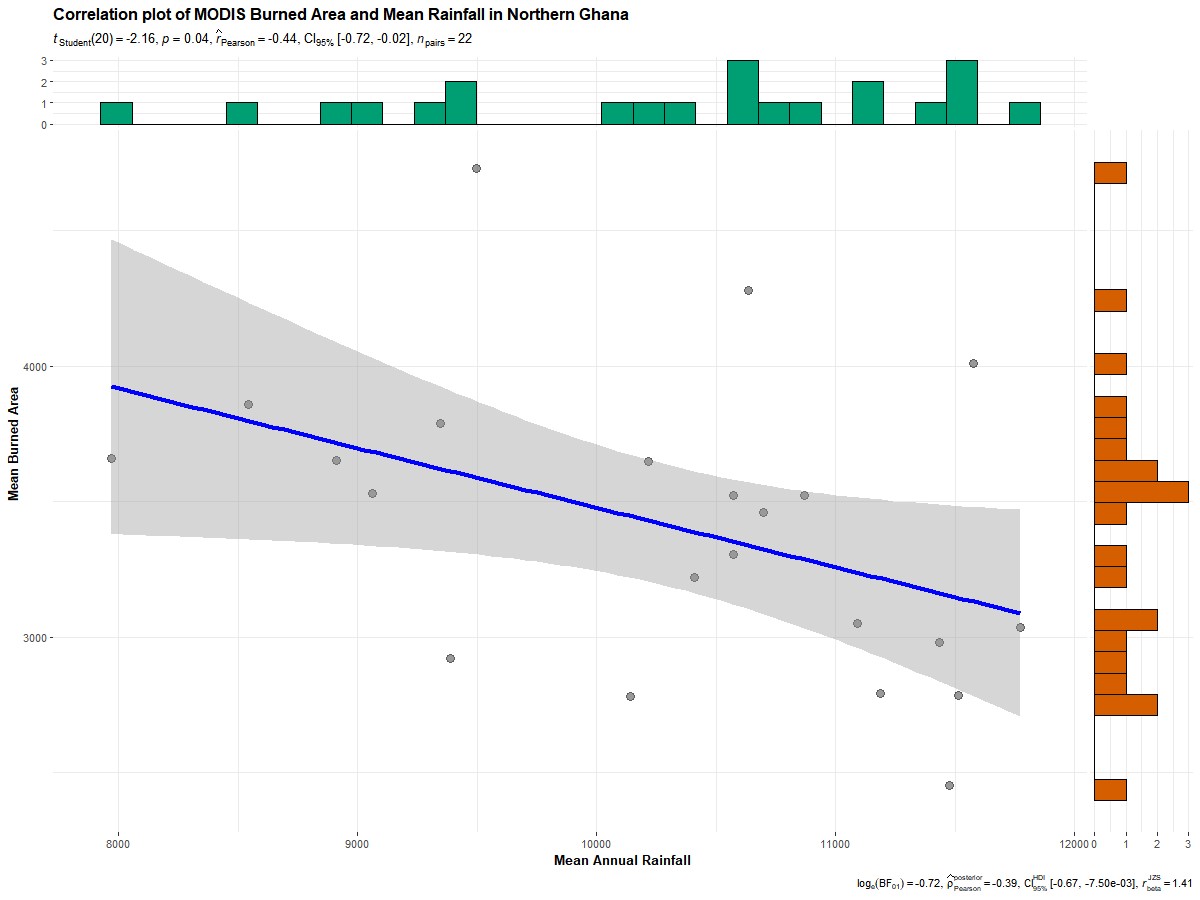


**Fig. 3**: Correlation plot of Rainfall and MODIS Burned for Northern Ghana. A statistically significant but weak negative correlation was observed between rainfall and MODIS Burned Areas (r = -0.44, p = 0.04)
